# Supplementary material
Source: publisher figshare collection journal article supplement (https://acs.figshare.com/ndownloader/files/6970880)
Supplement: Supplementary file 1 [file 6970880]

# Confinement Effects of Metal-Organic Framework on the Formation of Charge-Transfer Tetrathiafulvalene Dimers

Ting Chen, Peng Huo, Jin-Le Hou, Jing Xu, Qin-Yu Zhu,\* and Jie Dai\*

College of Chemistry, Chemical Engineering and Materials Science, Soochow University, Suzhou 215123, P. R. China

## Figure:

Figure S1 The experimental powder XRD patterns and the simulated patterns from the crystal data of compounds **1–3**.

Figure S2 PXRD of the freshly prepared crystals, samples kept in ambient condition for three months and after CV measurement of compounds **1–3**.

Figure S3 Raman spectra for compounds **2** and **3**.

Figure S4 The chain structure bridged by L along the *b* axis of  $[\text{MnL}(\text{bpp})]_n$  (**1**), bpp is omitted for clarity.

Figure S5 (a) Structure of  $[\text{Cd}_2\text{L}(\text{bpp})_2(\text{H}_2\text{O})(\text{C}_2\text{O}_4)_{0.5}]_n \cdot n(\text{ClO}_4) \cdot n(\text{H}_2\text{O})$  (**3**). (b) and (c) Centrosymmetric tetranuclear cluster through double  $\mu_2$ -O bridges from two different L. (d) 3-D MOF structure showing that TTF dimers, perchlorate anions and water molecules are occupied in the pores.

## Table:

Table S1. Crystal data and structural refinement parameters for **1–3**.

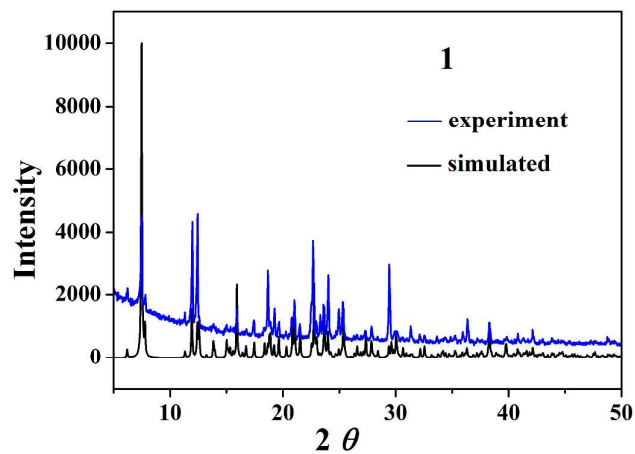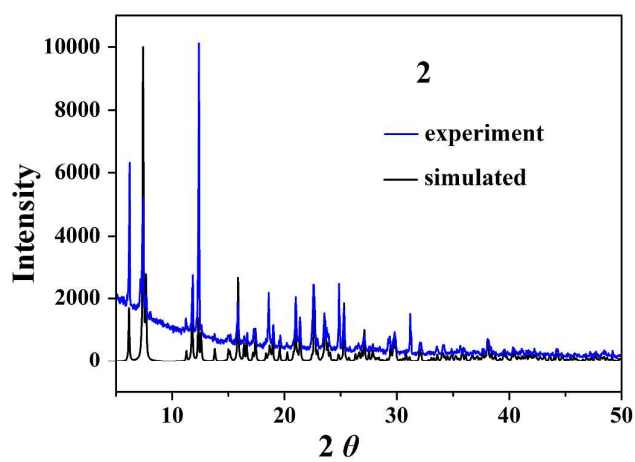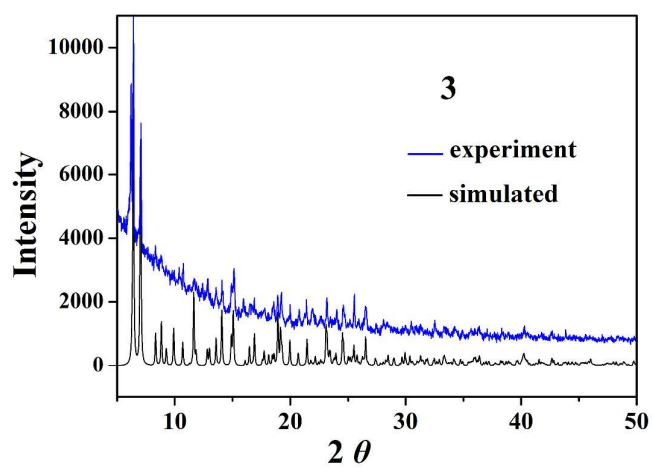

Figure S1 The experimental powder XRD patterns and the simulated patterns from the crystal data of compounds **1–3**.

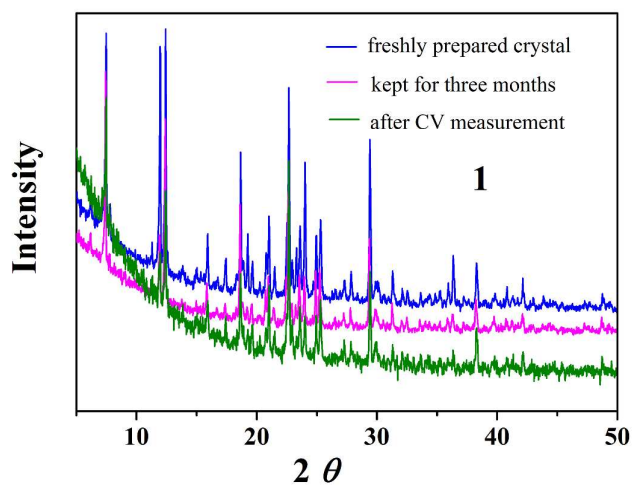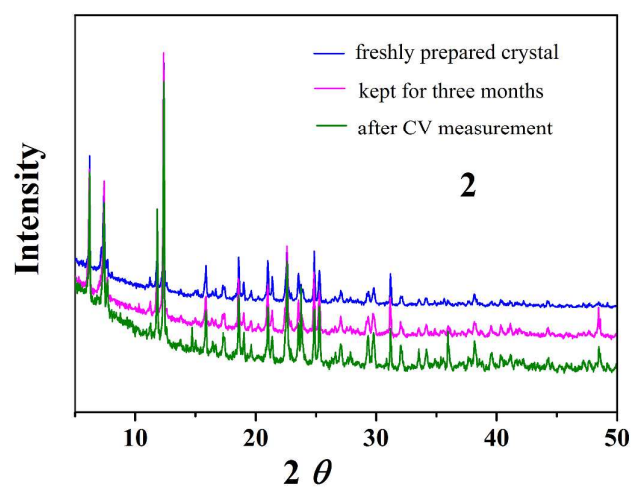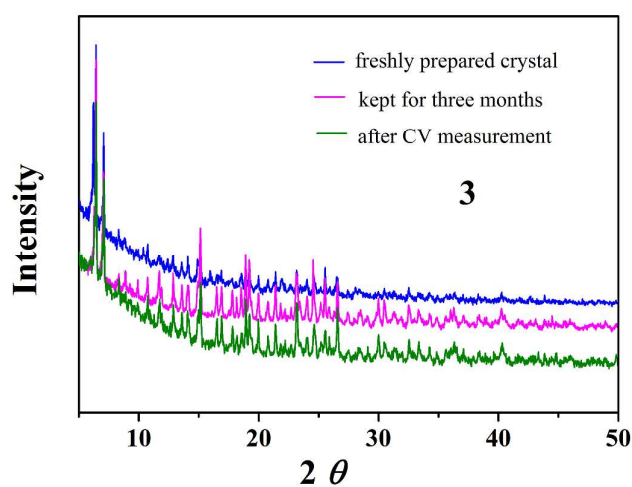

Figure S2 PXRD of the freshly prepared crystals, samples kept in ambient condition for three months and after CV measurement of compounds **1–3**.

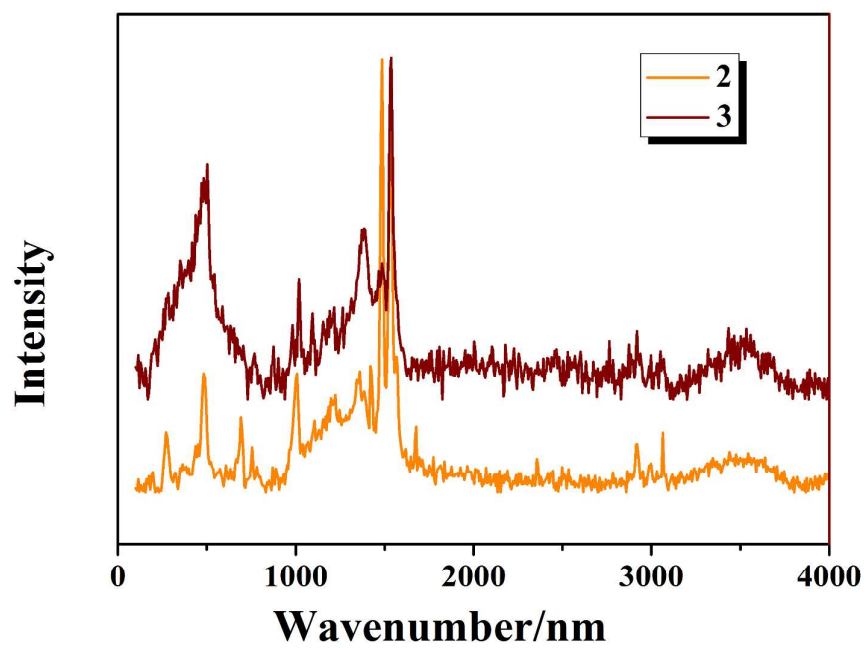

Figure S3 Raman spectra for compounds **2** and **3**.

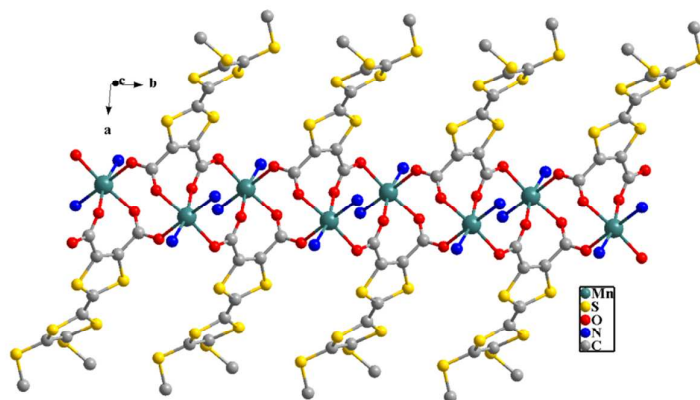

Figure S4 The chain structure bridged by L along the *b* axis of  $[\text{MnL}(\text{bpp})]_n$  (**1**), bpp is omitted for clarity.

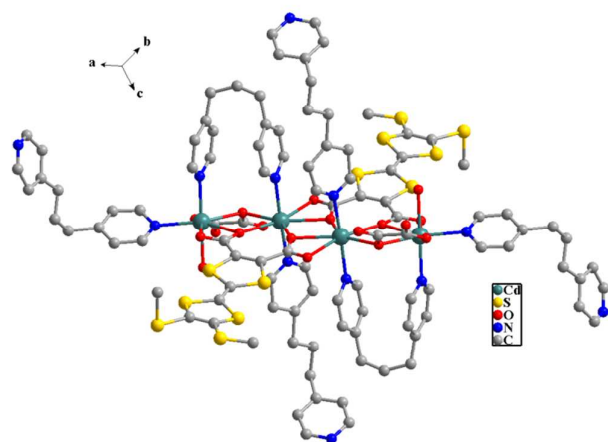

(a)

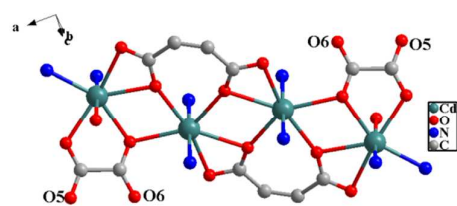

(b)

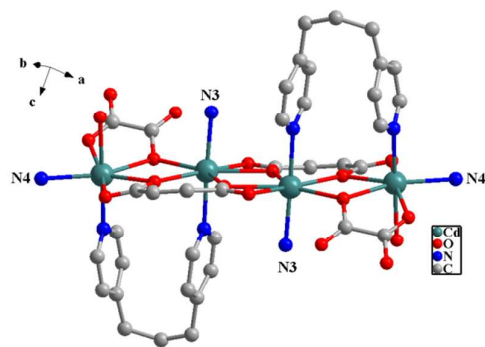

(c)

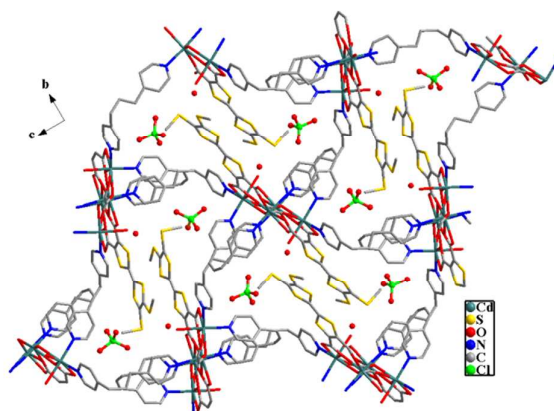

(d)

Figure S5 (a) Structure of  $[\text{Cd}_2\text{L}(\text{bpp})_2(\text{H}_2\text{O})(\text{C}_2\text{O}_4)_{0.5}]_n \cdot n(\text{ClO}_4) \cdot n(\text{H}_2\text{O})$  (**3**). (b) and (c) Centrosymmetric tetranuclear cluster through double  $\mu_2\text{-O}$  bridges from two different L. (d) 3-D MOF structure showing that TTF dimers, perchlorate anions and water molecules are occupied in the pores.

Table S1. Crystal data and structural refinement parameters for **1–3**.

|                                                    | <b>1</b>                                                                       | <b>2</b>                                                                       | <b>3</b>                                                                                        |
|----------------------------------------------------|--------------------------------------------------------------------------------|--------------------------------------------------------------------------------|-------------------------------------------------------------------------------------------------|
| formula                                            | C <sub>23</sub> H <sub>20</sub> MnN <sub>2</sub> O <sub>4</sub> S <sub>6</sub> | C <sub>23</sub> H <sub>20</sub> MnN <sub>2</sub> O <sub>4</sub> S <sub>6</sub> | C <sub>37</sub> H <sub>38</sub> Cd <sub>2</sub> ClN <sub>4</sub> O <sub>12</sub> S <sub>6</sub> |
| fw                                                 | 635.71                                                                         | 693.17                                                                         | 1183.32                                                                                         |
| cryst size (mm <sup>3</sup> )                      | 0.10×0.20×0.40                                                                 | 0.05×0.15×0.15                                                                 | 0.15×0.20×0.40                                                                                  |
| cryst syst                                         | monoclinic                                                                     | monoclinic                                                                     | monoclinic                                                                                      |
| space group                                        | <i>C2/c</i>                                                                    | <i>C2/c</i>                                                                    | <i>P2<sub>1</sub>/n</i>                                                                         |
| <i>a</i> (Å)                                       | 30.627(4)                                                                      | 30.933(8)                                                                      | 11.679(2)                                                                                       |
| <i>b</i> (Å)                                       | 7.4058(9)                                                                      | 7.3886(16)                                                                     | 16.526(3)                                                                                       |
| <i>c</i> (Å)                                       | 25.397(3)                                                                      | 25.700(7)                                                                      | 25.117(5)                                                                                       |
| <i>α</i> (deg)                                     | 90.00                                                                          | 90.00                                                                          | 90.00                                                                                           |
| <i>β</i> (deg)                                     | 111.391(3)                                                                     | 111.909(6)                                                                     | 90.02(3)                                                                                        |
| <i>γ</i> (deg)                                     | 90.00                                                                          | 90.00                                                                          | 90.00                                                                                           |
| <i>V</i> (Å <sup>3</sup> )                         | 5363.6(12)                                                                     | 5449(2)                                                                        | 4848.0(17)                                                                                      |
| <i>Z</i>                                           | 8                                                                              | 8                                                                              | 4                                                                                               |
| $\rho_{\text{calcd}}$ (g cm <sup>-3</sup> )        | 1.574                                                                          | 1.690                                                                          | 1.621                                                                                           |
| <i>F</i> (000)                                     | 2600                                                                           | 2784                                                                           | 2372                                                                                            |
| $\mu$ (mm <sup>-1</sup> )                          | 0.993                                                                          | 1.295                                                                          | 1.250                                                                                           |
| <i>T</i> (K)                                       | 293(2)                                                                         | 293(2)                                                                         | 293(2)                                                                                          |
| reflns collected                                   | 14878                                                                          | 12577                                                                          | 35447                                                                                           |
| unique reflns                                      | 6132                                                                           | 4652                                                                           | 8341                                                                                            |
| observed reflns                                    | 4450                                                                           | 3019                                                                           | 6384                                                                                            |
| no. params                                         | 328                                                                            | 323                                                                            | 546                                                                                             |
| GOF on <i>F</i> <sup>2</sup>                       | 1.130                                                                          | 1.194                                                                          | 1.141                                                                                           |
| <i>R</i> <sub>1</sub> [ <i>I</i> >2σ( <i>I</i> )]  | 0.0769                                                                         | 0.1225                                                                         | 0.1259                                                                                          |
| <i>wR</i> <sub>2</sub> [ <i>I</i> >2σ( <i>I</i> )] | 0.1267                                                                         | 0.1802                                                                         | 0.1805                                                                                          |
